# Supplementary material
Source: MDPI journal article supplement (https://www.mdpi.com/2624-8549/4/1/17)
Supplement: s1 [file s1]

## Supplementary Information

for:

### Long-range Supramolecular Synthron Polymorphism. An Insight from the Case Study of Vinylic Tellurium Trihalides $Z\text{-Cl(Ph)C=C(Ph)TeX}_3$ . ( $X = \text{Cl, Br, I}$ ).

Yury V. Torubaev <sup>1</sup>, Aida S. Samigullina <sup>2</sup>.

© 2021

<sup>1</sup> N.S. Kurnakov Institute of General and Inorganic Chemistry of Russia Academy of Sciences,  
Moscow, Russia.

<sup>2</sup> N.D. Zelinsky Institute of Organic Chemistry of Russian Academy of Sciences,  
Moscow, Russia.

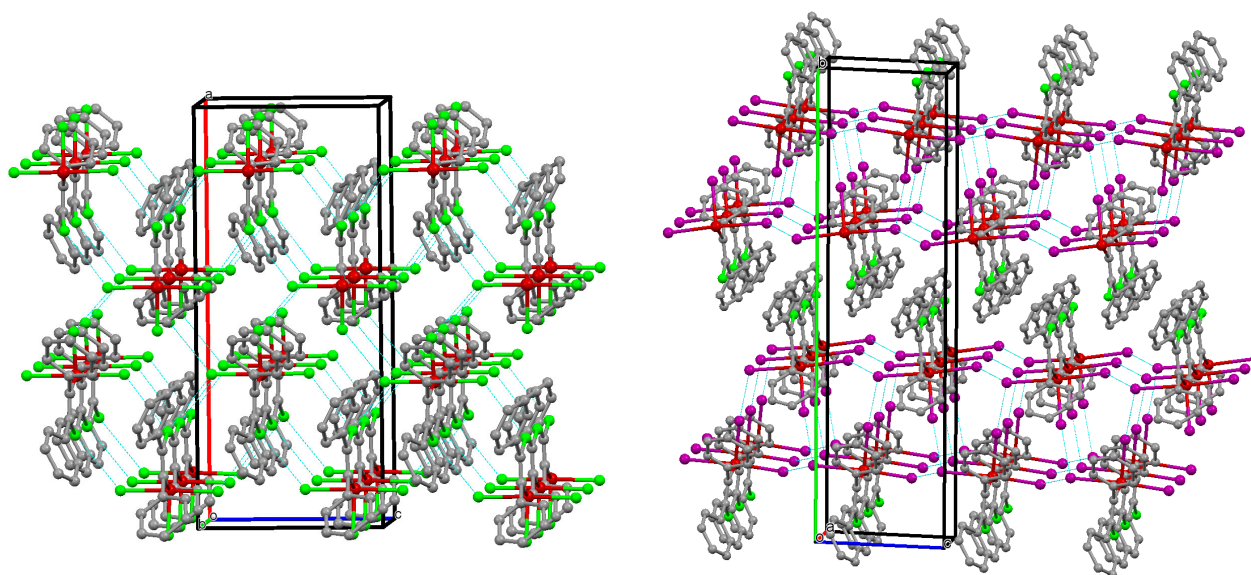

Figure S1

Fragments of the packing in (a)  $1\alpha$   $Pca2_1$  a 21.031(3) b 8.2010(8) c 9.215(1) and (b)  $2\alpha$   $P2_1/c$  a 8.2395(5) b 27.9101(17) c 8.7289(5)

**Table S1.** Lattice energy

Calculated in Crystal Explorer 17.5 (CE-B3LYP-DGDZVP, 25 Å cluster)

|                             |               |
|-----------------------------|---------------|
| <b>1<math>\alpha</math></b> | -247,6 kJ/mol |
| <b>1<math>\beta</math></b>  | -243,2 kJ/mol |
|                             | -4,4 kJ/mol   |

|                             |               |
|-----------------------------|---------------|
| <b>2<math>\alpha</math></b> | -246,7 kJ/mol |
| <b>2<math>\beta</math></b>  | -242 kJ/mol   |
|                             | -4.7 kJ/mol   |

***Powder XRD***

The compound was analyzed by powder X-Ray diffraction method to estimate the purity of the sample and check of possible presence of other crystal phases. The overlay of the experimental powder diffraction pattern with the theoretically calculated one shows good correlation of the crystal structures with the material. But in both cases we observe the presence of impurity components.

The PXRD analysis of **1 $\beta$**  (Cc) sample revealed the ~20% admixture of **1 $\alpha$**  (*P2<sub>1</sub>/c*) in addition to 80% of **1 $\beta$**  (see Fig. S2, S3). Further recrystallization of this **1 $\beta$**  sample afforded only **1 $\alpha$**  as the main product (90%) (see Fig. S4, S5), contaminated with the unidentified admixtures, which possibly may be the products of hydrolysis of **1**. Hydrolytic cleavage of Te-Cl bonds in tellurium trichlorides is well documented and earlier we have particularly demonstrated such a possibility for **1**, resulting in Cl(Ph)C=C(Ph)TeCl<sub>2</sub>OH-DMSO solvate [1]. Although the detailed study of the decomposition byproducts is out of the focus of this work, we can note that much higher phase purity of **2 $\beta$**  and **2 $\alpha$**  - **$\beta$**  even after several recrystallizations is in good agreement with the increasing stability of tellurium trihalides towards the hydrolysis in a row RTeI<sub>3</sub>>RTeBr<sub>3</sub>>RTeCl<sub>3</sub>.

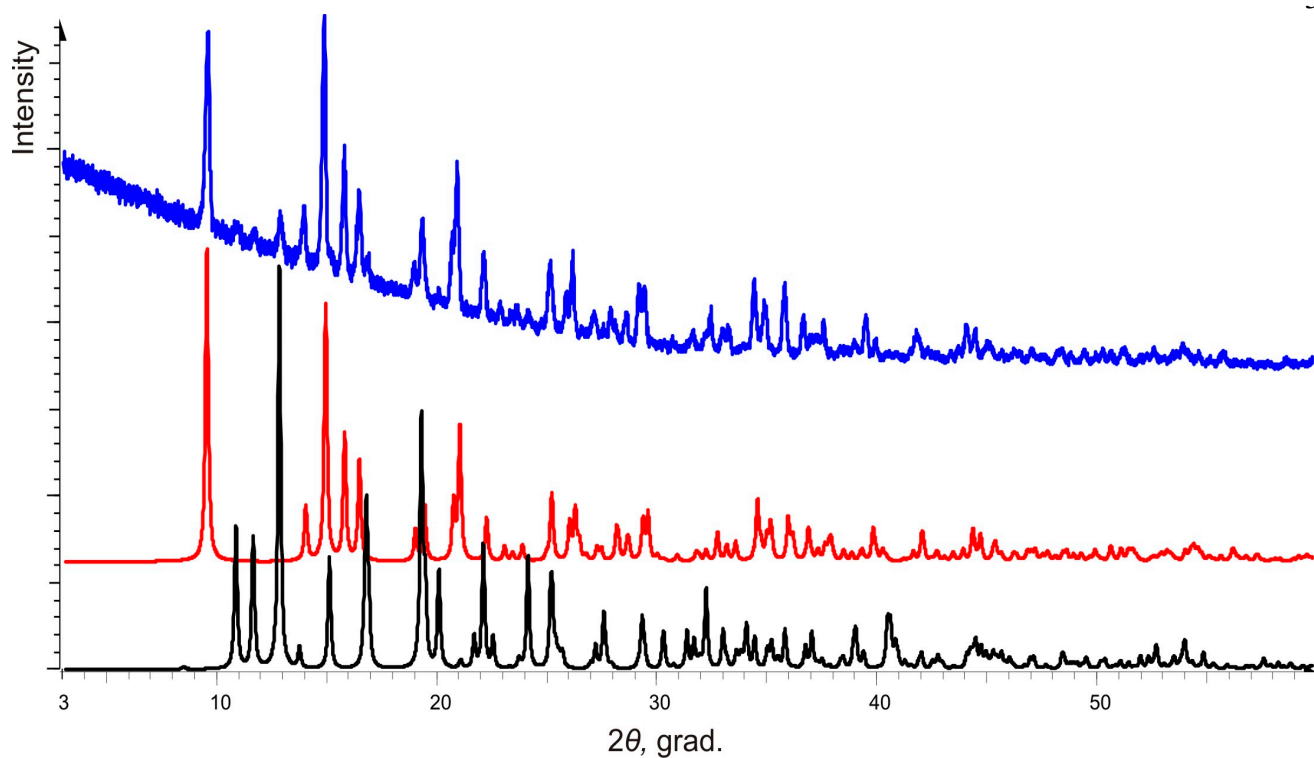

**Figure S2**

Theoretical powder diffraction patterns of  $1\alpha$ -polymorph (black) and  $1\beta$ -polymorph (red) and experimental patterns of the crystalline sample  $1\beta$  (blue).

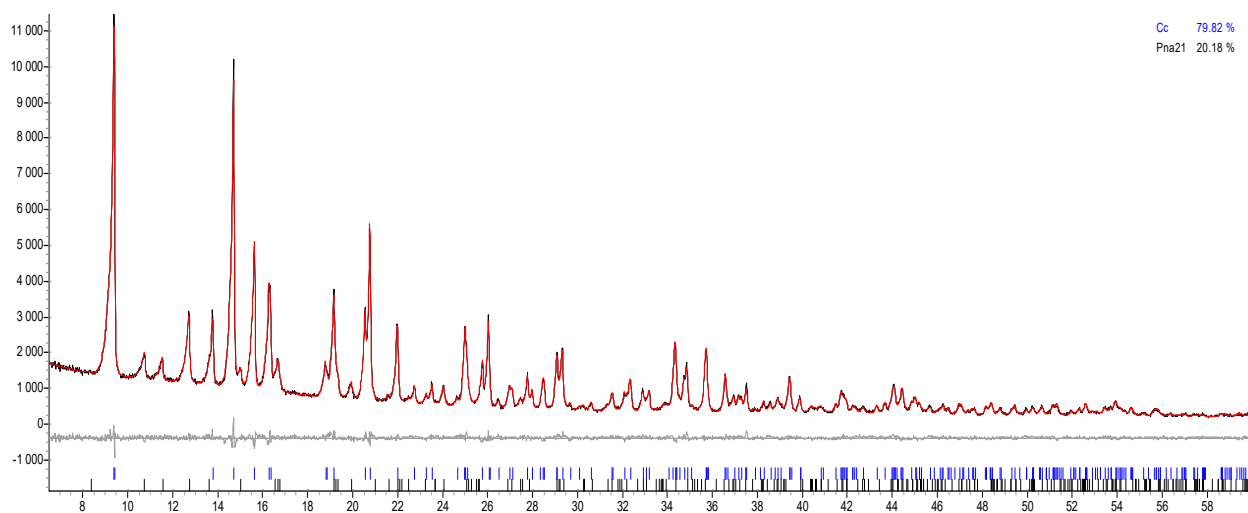

**Figure S3**

Final fit of the Rietveld refinement of the structure  $1\beta$  ( $R_{wp} = 0.031$ ): experimental X-ray diffraction pattern (black), Pawley fit (red) and difference profile (gray). .

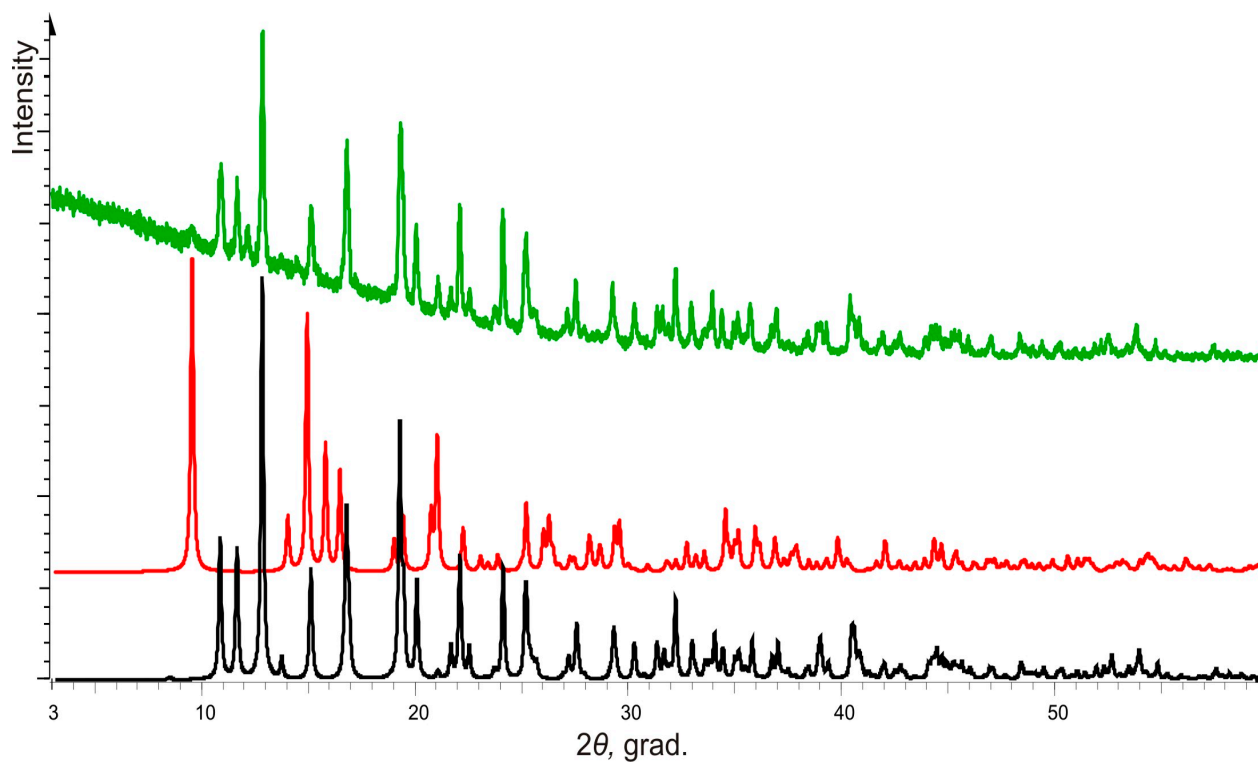

**Figure S4**

Theoretical powder diffraction patterns of **1α**-polymorph (black) and **1β**-polymorph (red) and experimental patterns of the crystalline sample **1α** (green).

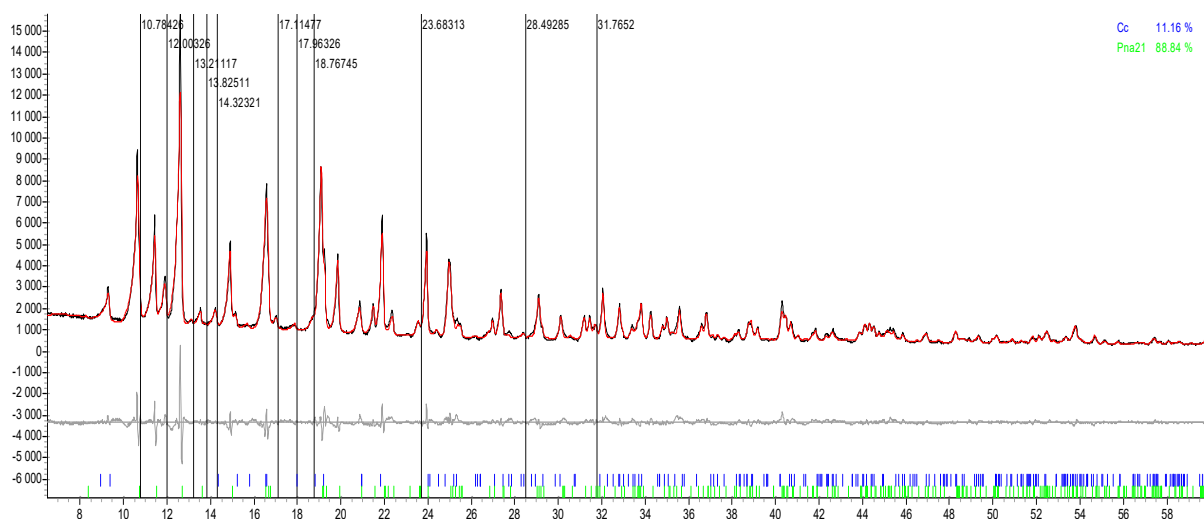

**Figure S5**

Final fit of the Rietveld refinement of the structure **1α** ( $R_{wp} = 0.067$ ): experimental X-ray diffraction pattern (black), Pawley fit (red) and difference profile (gray).

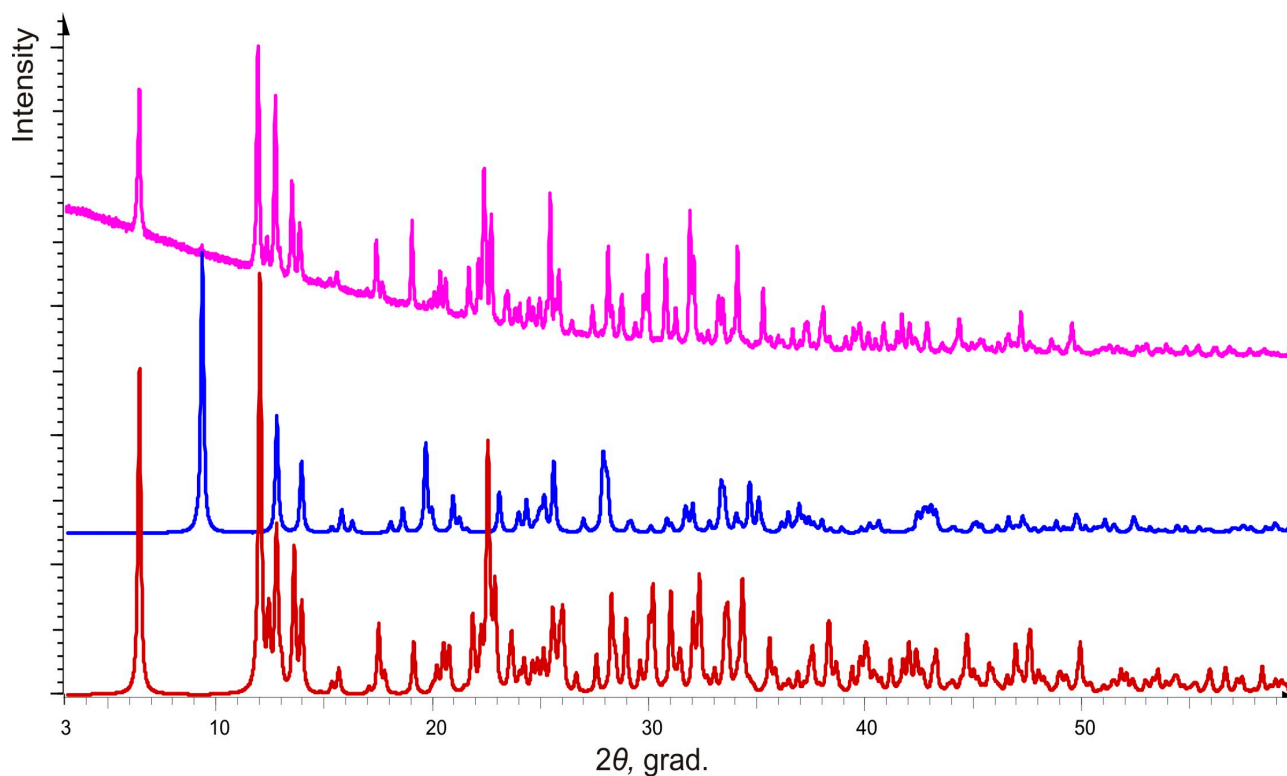

**Figure S6**

Figure 5. Theoretical powder diffraction patterns of  $2\alpha$ -polymorph (brown) and  $2\beta$ -polymorph (blue) and experimental patterns of the crystalline sample  $2\beta$  (magenta).

**Table S2.** Interaction Energies (kJ/mol) in  $1\alpha$

|  | N | Symop              | R     | Electron Density | E_ele | E_pol | E_dis | E_rep | E_tot |
|--|---|--------------------|-------|------------------|-------|-------|-------|-------|-------|
|  | 1 | $x+1/2, -y, z$     | 11.14 | B3LYP/DGDZVP     | -3.1  | -0.5  | -10.6 | 4.7   | -10.0 |
|  | 1 | $-x+1/2, y, z+1/2$ | 6.49  | B3LYP/DGDZVP     | -15.1 | -3.0  | -48.8 | 43.8  | -33.6 |
|  | 0 | $-x, -y, z+1/2$    | 8.78  | B3LYP/DGDZVP     | 0.8   | -0.9  | -8.5  | 7.5   | -2.6  |
|  | 1 | $-x+1/2, y, z+1/2$ | 10.46 | B3LYP/DGDZVP     | -2.6  | -0.6  | -5.2  | 2.6   | -6.2  |
|  | 0 | $x, y, z$          | 8.20  | B3LYP/DGDZVP     | -19.6 | -1.7  | -32.4 | 38.3  | -26.5 |
|  | 1 | $-x+1/2, y, z+1/2$ | 10.46 | B3LYP/DGDZVP     | -7.2  | -1.2  | -8.5  | 9.5   | -10.0 |
|  | 0 | $-x, -y, z+1/2$    | 8.37  | B3LYP/DGDZVP     | -19.3 | -3.0  | -27.8 | 28.1  | -29.4 |

R is the distance between molecular centroids (mean atomic position) in Å.

Total energies are the sum of the four energy components, scaled appropriately [2]

| Energy Model                                 | k_ele | k_pol | k_disp | k_rep |
|----------------------------------------------|-------|-------|--------|-------|
| CE-B3LYP ... B3LYP/DGDZVP electron densities | 1.057 | 0.740 | 0.871  | 0.618 |

**Table S3.** Interaction Energies (kJ/mol) in **1 $\beta$** 

|  | N | Symop                | R     | Electron Density | E_ele | E_pol | E_dis | E_rep | E_tot |
|--|---|----------------------|-------|------------------|-------|-------|-------|-------|-------|
|  | 2 | x+1/2, -y+1/2, z+1/2 | 7.60  | B3LYP/DGDZVP     | -13.9 | -2.9  | -36.8 | 36.5  | -26.5 |
|  | 2 | x, -y, z+1/2         | 6.34  | B3LYP/DGDZVP     | -30.4 | -3.4  | -41.4 | 68.8  | -28.2 |
|  | 2 | x+1/2, -y+1/2, z+1/2 | 8.34  | B3LYP/DGDZVP     | -12.6 | -2.3  | -38.0 | 38.0  | -24.6 |
|  | 2 | x+1/2, y+1/2, z      | 10.82 | B3LYP/DGDZVP     | 0.4   | -0.5  | -6.6  | 3.1   | -3.8  |
|  | 2 | x, y, z              | 7.79  | B3LYP/DGDZVP     | -5.3  | -1.3  | -12.7 | 10.2  | -11.3 |
|  | 2 | x, y, z              | 10.89 | B3LYP/DGDZVP     | -10.6 | -1.6  | -11.8 | 17.1  | -12.1 |

R is the distance between molecular centroids (mean atomic position) in Å.

Total energies are the sum of the four energy components, scaled appropriately [2]

| Energy Model                                 | k_ele | k_pol | k_disp | k_rep |
|----------------------------------------------|-------|-------|--------|-------|
| CE-B3LYP ... B3LYP/DGDZVP electron densities | 1.057 | 0.740 | 0.871  | 0.618 |

**Table S4.** Interaction Energies (kJ/mol) in **3 $\alpha$** 

|  | N | Symop            | R     | Electron Density | E_ele | E_pol | E_dis | E_rep | E_tot |
|--|---|------------------|-------|------------------|-------|-------|-------|-------|-------|
|  | 1 | -x, -y, -z       | 8.45  | B3LYP/DGDZVP     | -13.0 | -2.1  | -34.2 | 37.4  | -22.0 |
|  | 0 | x, y, z          | 8.73  | B3LYP/DGDZVP     | -9.5  | -1.5  | -19.6 | 31.9  | -8.5  |
|  | 1 | x, y, z          | 9.02  | B3LYP/DGDZVP     | -3.7  | -0.8  | -17.1 | 12.4  | -11.8 |
|  | 1 | -x, -y, -z       | 11.06 | B3LYP/DGDZVP     | -8.3  | -1.3  | -33.7 | 23.0  | -24.8 |
|  | 1 | x, y, z          | 8.24  | B3LYP/DGDZVP     | -21.3 | -2.0  | -39.3 | 42.3  | -32.0 |
|  | 0 | x, -y+1/2, z+1/2 | 9.61  | B3LYP/DGDZVP     | -7.1  | -0.6  | -13.2 | 18.2  | -8.2  |
|  | 0 | x, -y+1/2, z+1/2 | 7.48  | B3LYP/DGDZVP     | -71.2 | -4.3  | -31.9 | 156.2 | -9.7  |
|  | 1 | -x, -y, -z       | 9.93  | B3LYP/DGDZVP     | -18.8 | -2.2  | -38.2 | 40.8  | -29.6 |
|  | 0 | -x, -y, -z       | 14.92 | B3LYP/DGDZVP     | 2.7   | -0.7  | -8.0  | 0.0   | -4.7  |

R is the distance between molecular centroids (mean atomic position) in Å.

Total energies are the sum of the four energy components, scaled appropriately[2]

| Energy Model                                 | k_ele | k_pol | k_disp | k_rep |
|----------------------------------------------|-------|-------|--------|-------|
| CE-B3LYP ... B3LYP/DGDZVP electron densities | 1.057 | 0.740 | 0.871  | 0.618 |

**Table S5.** Interaction Energies (kJ/mol) in **3 $\beta$** 

|  | N | Symop        | R    | Electron Density | E_ele | E_pol | E_dis | E_rep | E_tot |
|--|---|--------------|------|------------------|-------|-------|-------|-------|-------|
|  | 2 | x, -y, z+1/2 | 6.85 | B3LYP/DGDZVP     | -43.4 | -3.0  | -42.6 | 97.9  | -24.7 |

|   |                      |       |              |       |      |       |       |       |
|---|----------------------|-------|--------------|-------|------|-------|-------|-------|
| 2 | x, -y, z+1/2         | 12.32 | B3LYP/DGDZVP | -3.7  | -0.4 | -4.0  | 0.0   | -7.7  |
| 2 | x+1/2, -y+1/2, z+1/2 | 8.94  | B3LYP/DGDZVP | -11.2 | -1.6 | -35.1 | 33.8  | -22.7 |
| 2 | x, y, z              | 8.57  | B3LYP/DGDZVP | -8.7  | -1.1 | -21.3 | 23.1  | -14.2 |
| 2 | x+1/2, -y+1/2, z+1/2 | 7.74  | B3LYP/DGDZVP | -49.4 | -3.7 | -41.4 | 111.5 | -22.0 |
| 2 | x, y, z              | 11.17 | B3LYP/DGDZVP | -12.2 | -1.3 | -17.1 | 25.8  | -12.8 |
| 2 | x+1/2, y+1/2, z      | 11.33 | B3LYP/DGDZVP | 0.8   | -0.3 | -4.6  | 0.5   | -3.1  |

R is the distance between molecular centroids (mean atomic position) in Å.

Total energies are the sum of the four energy components, scaled appropriately [2]

| Energy Model                                 | k_ele | k_pol | k_disp | k_rep |
|----------------------------------------------|-------|-------|--------|-------|
| CE-B3LYP ... B3LYP/DGDZVP electron densities | 1.057 | 0.740 | 0.871  | 0.618 |

1. Torubaev, Y.V.; Lyssenko, K.A.; Popova, A.E. Halogen and Hydrogen Bonds in Co-crystalline Ferrocenium Organotellurium Halide Salts. *Russian Journal of Coordination Chemistry* **2019**, *45*, 788-794, doi:10.1134/s1070328419110095.
2. Mackenzie, C.F.; Spackman, P.R.; Jayatilaka, D.; Spackman, M.A. CrystalExplorer model energies and energy frameworks: extension to metal coordination compounds, organic salts, solvates and open-shell systems. *IUCrJ* **2017**, *4*, 575-587, doi:10.1107/S205225251700848X.
